# Supplementary material
Source: Springer Nature journal article supplement (https://www.springermedizin.de/resource/supplementary/13075_2013_4432_MOESM2_ESM.pdf/10110394)
Supplement: MOESM2 [file 10110394]

**Figure S1**

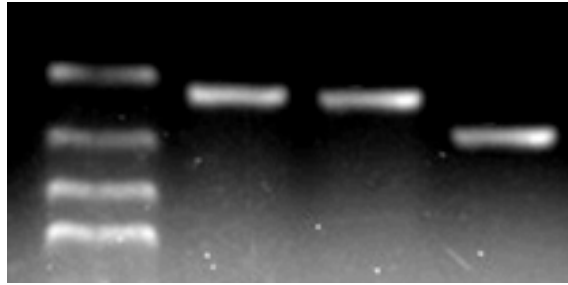

Marker IL-28R $\alpha$  IL-10R2 GAPDH
